# Supplementary material for: Axonal remodeling for motor recovery after traumatic brain injury requires downregulation of γ-aminobutyric acid signaling
Source: PubMed Central journal article supplement — Cell Death Dis. 2011 Mar 17;2(3):e133–. doi: 10.1038/cddis.2011.16 (PMC3101813; doi:10.1038/cddis.2011.16), 2011-03-17

## Supplemental figure legend

**Supplemental figure 1.** Influence of muscimol infusion on motor function and cortical cells. **A**, Illustration of the experimental procedure for muscimol infusion after brain injury. Brain contusion injury was induced in the right sensorimotor cortex (red). A cannula was implanted into the left hemisphere. Muscimol or saline was infused for 7 days starting at day 3 after the injury. At day 10, the pump was removed. BDA was injected into the left hemisphere at 14 days and the animals were sacrificed at 28 days. **B**, Temporal impairment of motor function of the unaffected (right) forelimb by muscimol infusion during the grid walk test after the injury (saline-treated group, dotted line; muscimol-treated group, solid line). **C**, The cortical lesion volume did not differ between the groups after the injury. **D**, No apparent damage to the cortical cells by saline or muscimol infusion in the contralesional cortex. The arrows indicate the infused region. Scale bar: 200  $\mu\text{m}$ . The data represented the mean  $\pm$  SD ( $n = 6$ );  $**p < 0.01$  versus the saline-treated group (Mann-Whitney  $U$ -test). **E**, Expression of *alivin-1*, a neuronal activity-dependent gene, increased in the contralesional cortex at 7 days after the injury. The data represent the mean  $\pm$  SD ( $n = 3$ );  $*p < 0.05$  (Mann-Whitney  $U$ -test).

Supplemental Table

Primer sequences for Alivin1

| name    |         | Primer sequence       |
|---------|---------|-----------------------|
| Alivin1 | Forward | GCTTCCCAGCGCTGTGA     |
|         | Reverse | ATCAGCTCAGTCTCCCACCAA |

Supplemental Figure 1

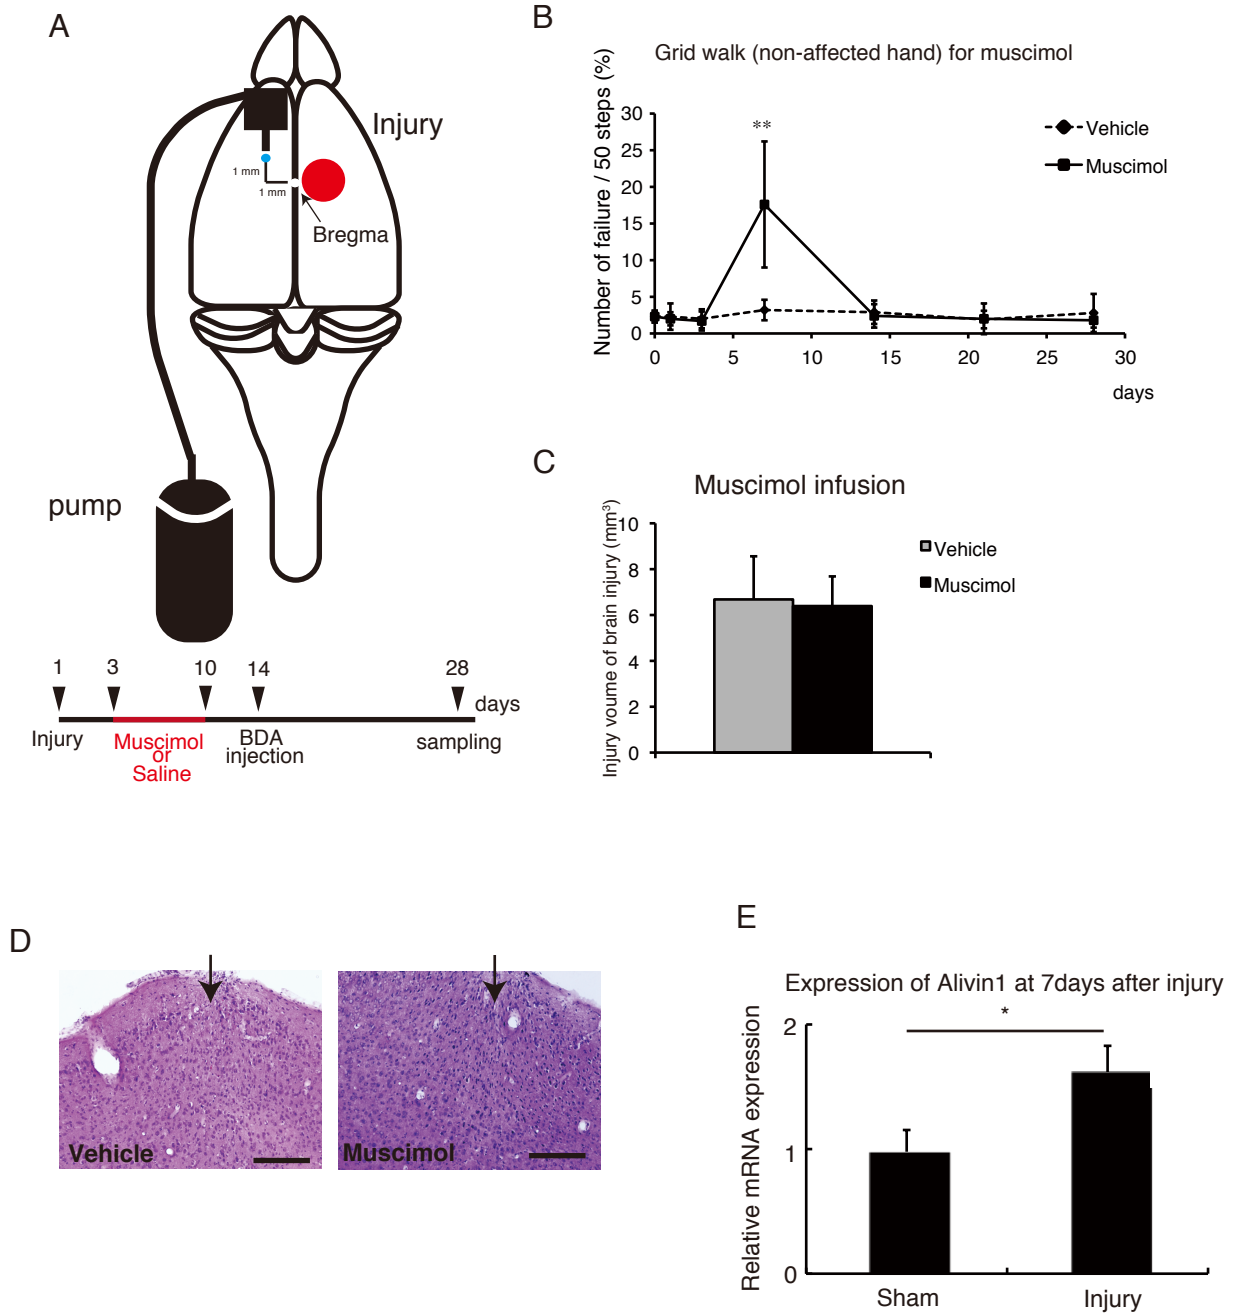

Supplement: cddis201116x1.pdf [file cddis201116x1.pdf]
